# Supplementary material
Source: publisher figshare collection journal article supplement (https://acs.figshare.com/ndownloader/files/3588885)
Supplement: Supplementary file 1 [file 3588885]

## Supporting Information

# Binary Ionic Liquid with a Common Cation: Insight into Nanoscopic Mixing by Infrared Spectroscopy

*Jean-Michel Andanson, Matthias Josef Beier and Alfons Baiker \**

Institute for Chemical and Bioengineering, Department of Chemistry and Applied Biosciences, ETH  
Zurich, Hönggerberg, HCI, Wolfgang-Pauli-Str. 10, CH-8093 Zurich, Switzerland.

\*Corresponding author:

E-mail address: [baiker@chem.ethz.ch](mailto:baiker@chem.ethz.ch)

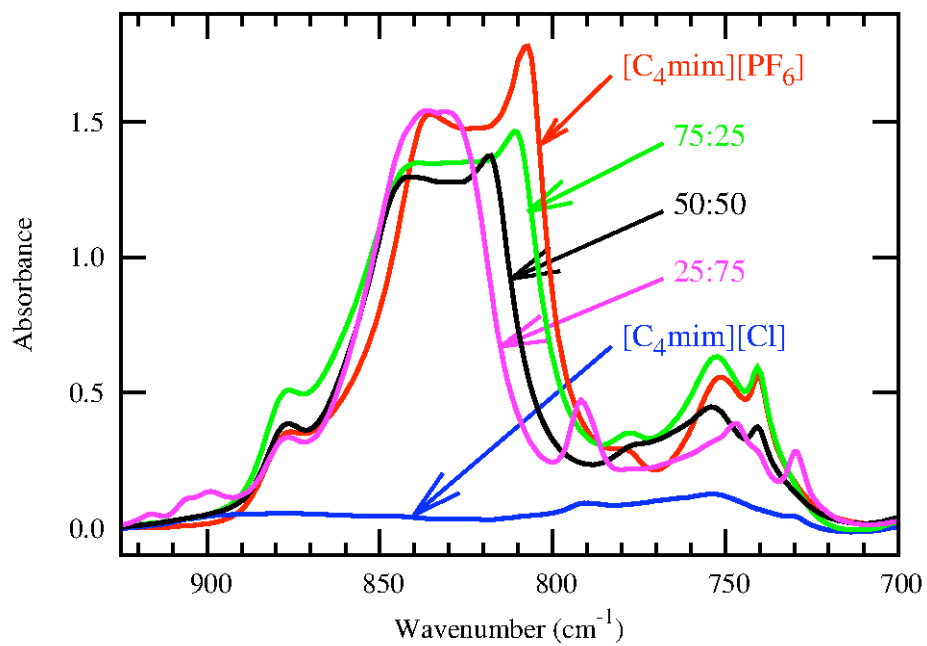

**Figure S1:** IR signal of  $\text{PF}_6^-$  anion bands for  $[\text{C}_4\text{mim}][\text{PF}_6]/[\text{C}_4\text{mim}]\text{Cl}$  mixtures at molar ratio of 0, 0.25, 0.50, 0.75 and 1.

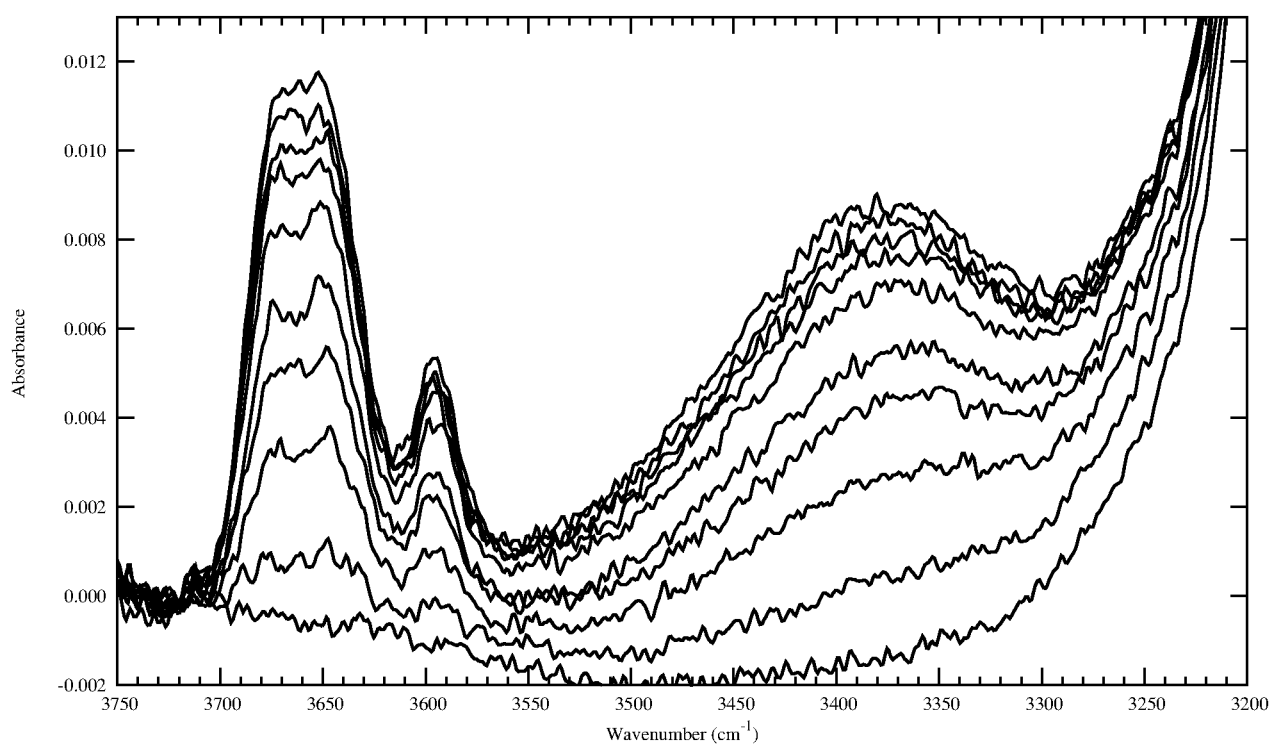

**Figure S2:** Evolution of the water bands with time in mixture of 90/10 ratio of  $[\text{C}_4\text{mim}][\text{PF}_6]/[\text{C}_4\text{mim}]\text{Cl}$ . Spectra were recorded after 0, 2, 4, 6, 10, 15, 20, 25, 30 and 35 min (from bottom to top).

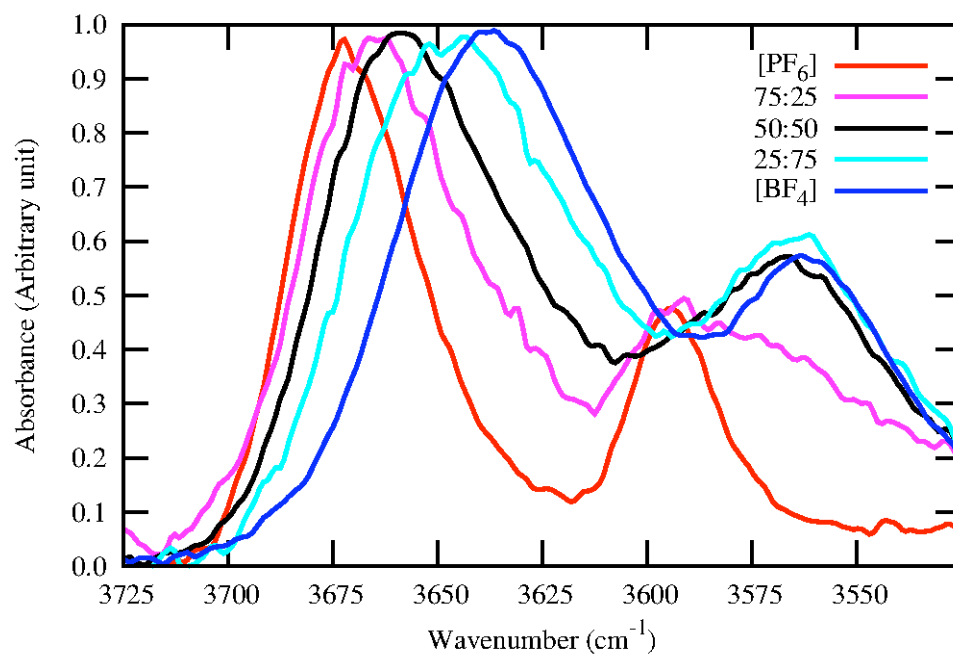

**Figure S3:** Normalized IR bands in the OH stretching region for mixtures of wet  $[\text{C}_4\text{mim}][\text{PF}_6]/[\text{C}_4\text{mim}][\text{BF}_4]$  at molar ratio of 0, 0.25, 0.50, 0.75 and 1.
